# Supplementary material
Source: Springer Nature journal article supplement (https://www.springermedizin.de/resource/supplementary/12916_2006_89_MOESM4_ESM.pdf/9599144)

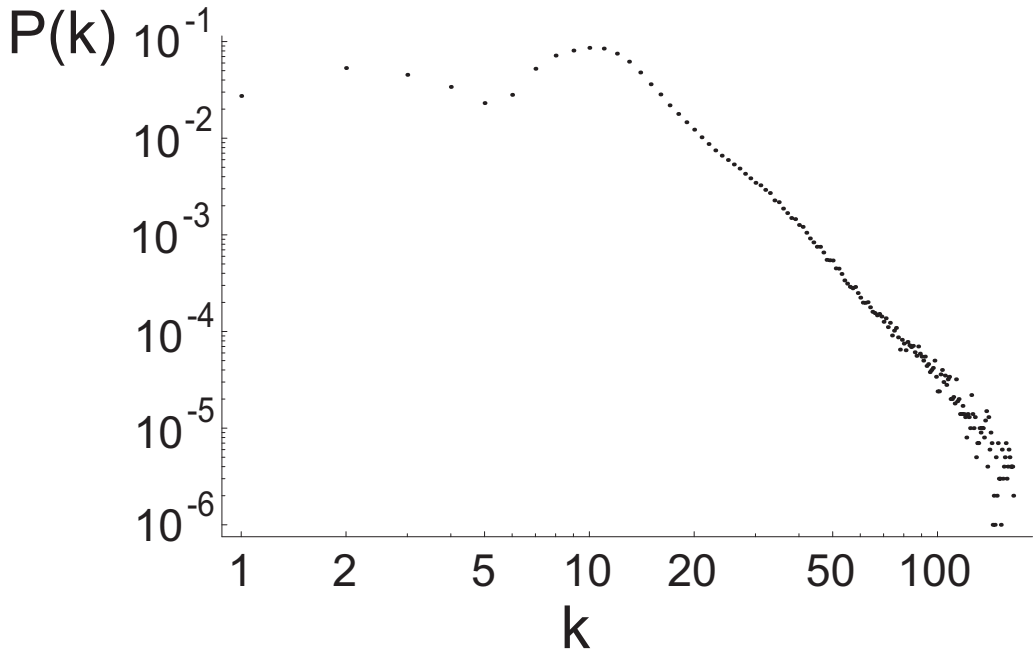

Supplement: MOESM4 [file 9599144]
